# Supplementary material
Source: PubMed Central journal article supplement (PMC3507492)
Supplement: cc-11-3964-s01.pdf [file cc-11-3964-s01.pdf]

## **Supplemental Material to:**

**Ubaldo E. Martinez-Outschoorn, Zhao Lin,  
Diana Whitaker-Menezes, Anthony Howell,  
Federica Sotgia and Michael P. Lisanti**

**Ketone body utilization drives tumor  
growth and metastasis**

**2012; 11(21)**

**<http://dx.doi.org/10.4161/cc.22137>**

**<http://www.landesbioscience.com/journals/cc/article/22137>**

**Supplemental Table 1. Proteomic Analysis of MDA-MB-231 Cells After 3-Hydroxy-Butyrate Treatment**

|                                                                             | Fold change<br>(Butyrate/Control) | Accession Number | Protein Spot Number | Localization |
|-----------------------------------------------------------------------------|-----------------------------------|------------------|---------------------|--------------|
| <b>Protein Synthesis</b>                                                    |                                   |                  |                     |              |
| ribosomal protein, large, P2 (RPLP2)                                        | 1.61                              | gi 4506671       | 18                  | Cyto         |
| eukaryotic translation initiation factor 2B, subunit 2 beta, 39kDa (EIF2B2) | 1.41                              | gi 7657058       | 10                  | Cyto         |
| eukaryotic translation elongation factor 1 alpha 1 (EEF1A1)                 | 1.4                               | gi 58761240      | 9                   |              |
| eukaryotic translation elongation factor 2 (EEF2)                           | 1.32                              | gi 4503483       | 3                   | Cyto         |
| <b>EMT Markers</b>                                                          |                                   |                  |                     |              |
| vimentin (VIM)                                                              | 2.57                              | gi 340219        | 7                   |              |
| vimentin (VIM)                                                              | 2.01                              | gi 340219        | 6                   |              |
| vimentin (VIM)                                                              | 1.61                              | gi 340219        | 5                   |              |
| myosin, light chain 6, alkali, smooth muscle and non-muscle (MYL6)          | 1.69                              | gi 113812151     | 19                  |              |
| <b>Metabolism/ Glycolysis</b>                                               |                                   |                  |                     |              |
| triosephosphate isomerase 1 (TPI1)                                          | 1.67                              | gi 999892        | 11                  | Cyto         |
| <b>Protein Folding/Calcium Binding/ Heat Shock</b>                          |                                   |                  |                     |              |
| calmodulin (CALM1)                                                          | 7.15                              | gi 12862373      | 17                  |              |
| calumenin (CALU)                                                            | 1.39                              | gi 119604085     | 8                   | ER           |
| calreticulin (CALR)                                                         | 1.31                              | gi 62897681      | 4                   | ER           |
| <b>Neuronal Proteins</b>                                                    |                                   |                  |                     |              |
| hippocalcin-like 1 (HPCAL1)                                                 | 1.5                               | gi 19913441      | 15                  |              |
| phosphatidylethanolamine binding protein 1 (PEBP1)                          | 1.42                              | gi 4505621       | 12                  | Cyto         |
| <b>Others</b>                                                               |                                   |                  |                     |              |
| CCHC-type zinc finger, nucleic acid binding protein (CNBP)                  | 2.38                              | gi 4827071       | 13                  | Cyto/ER      |
